# Supplementary material for: Click Synthesis of Triazole Polymers Based on Lignin-Derived Metabolic Intermediate and Their Strong Adhesive Properties to Cu Plate
Source: MDPI journal article supplement (doi:10.3390/polym15061349), 2023-03-08
Supplement: s1 [file s1]

# Click Synthesis of Triazole Polymers Based on Lignin-Derived Metabolic Intermediate and Their Strong Adhesive Properties to Cu Plate

Yijie Jin <sup>1</sup>, Manjusha Joshi <sup>1</sup>, Takuma Araki <sup>2</sup>, Naofumi Kamimura <sup>3</sup>, Eiji Masai <sup>3</sup>, Masaya Nakamura <sup>2</sup> and Tsuyoshi Michinobu <sup>1,\*</sup>

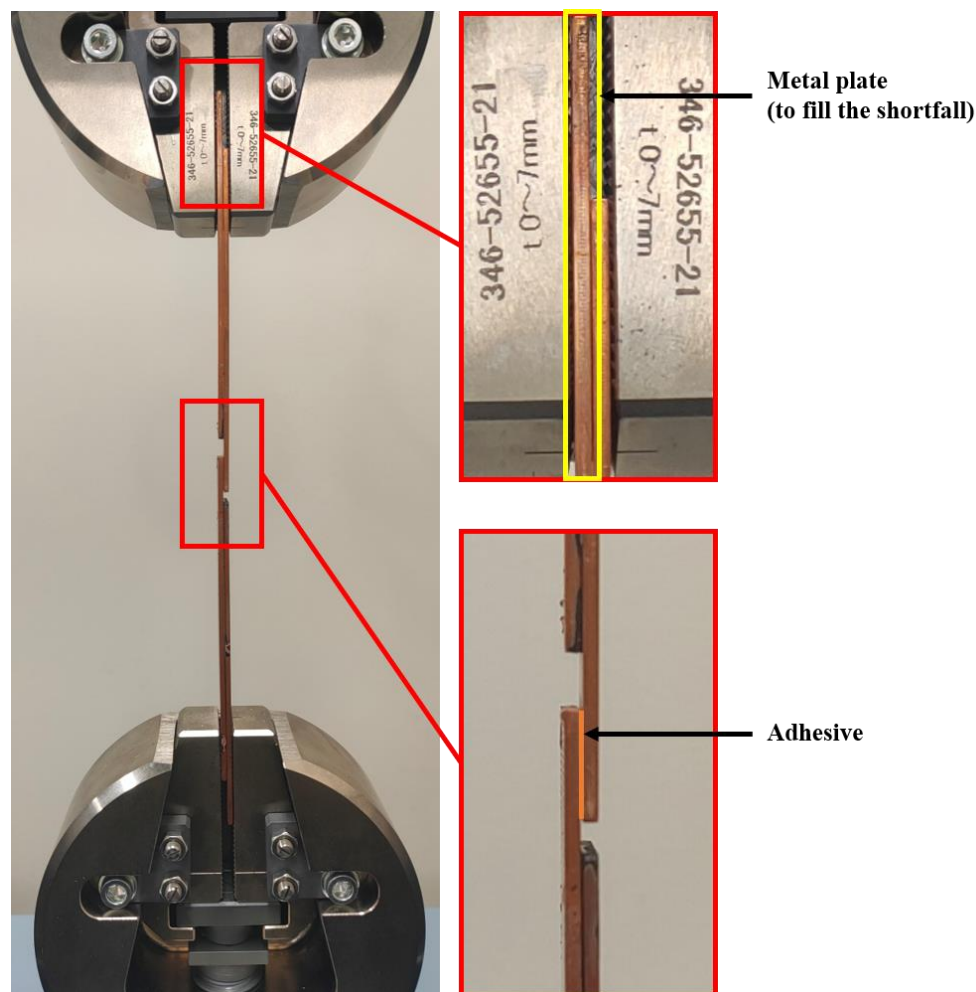

**Figure S1.** Tensile lap-shear strength measurements according to JIS K 6850-1994.

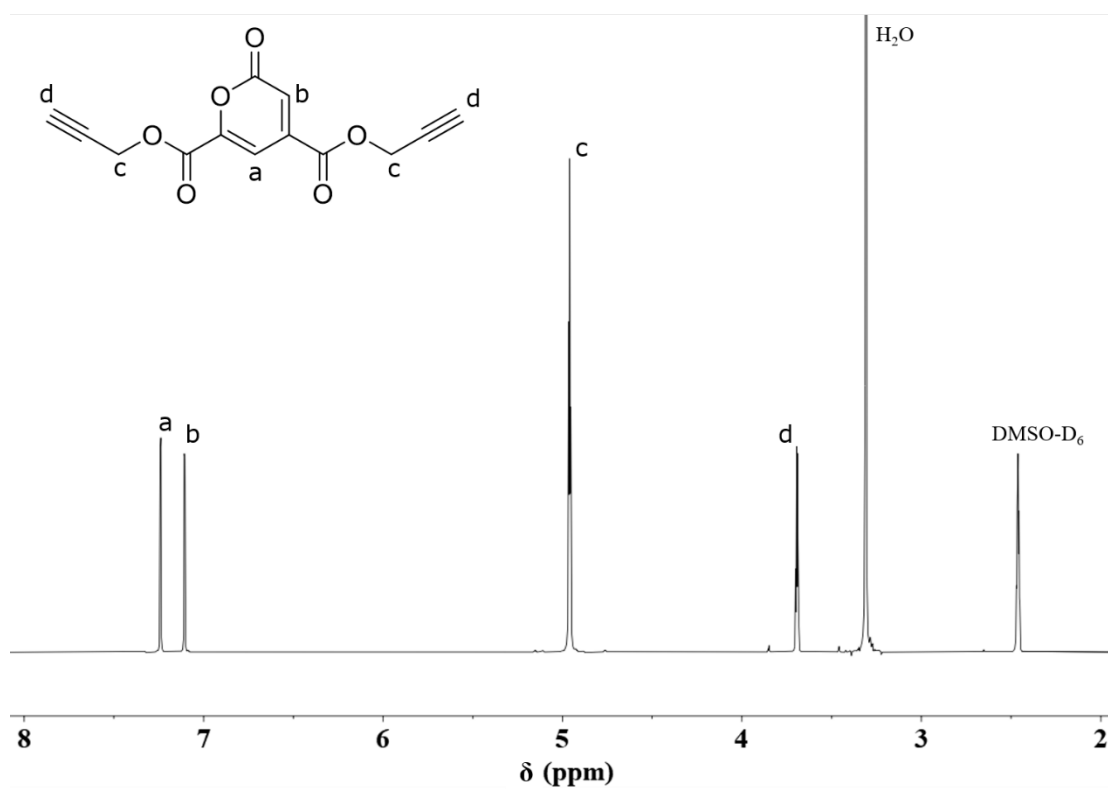

**Figure S2.** <sup>1</sup>H NMR spectra of **1** in DMSO-d<sub>6</sub> at 20 °C.

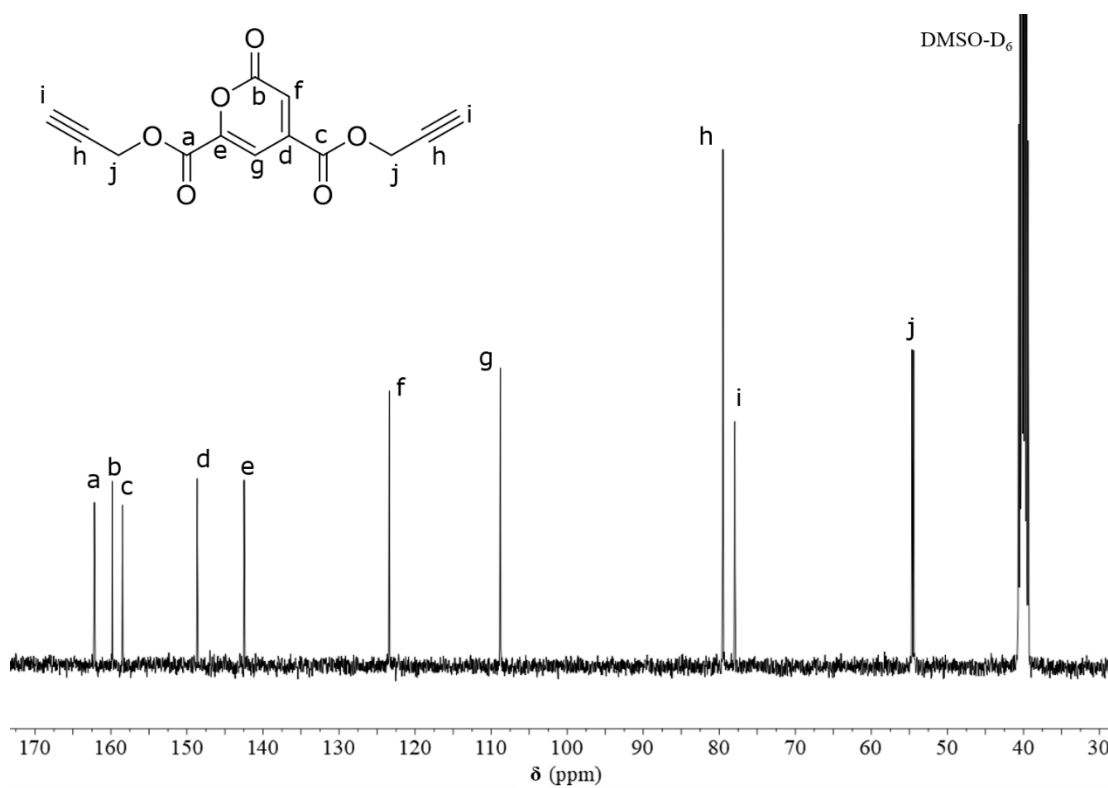

**Figure S3.** <sup>13</sup>C NMR spectra of **1** in DMSO-d<sub>6</sub> at 20 °C.

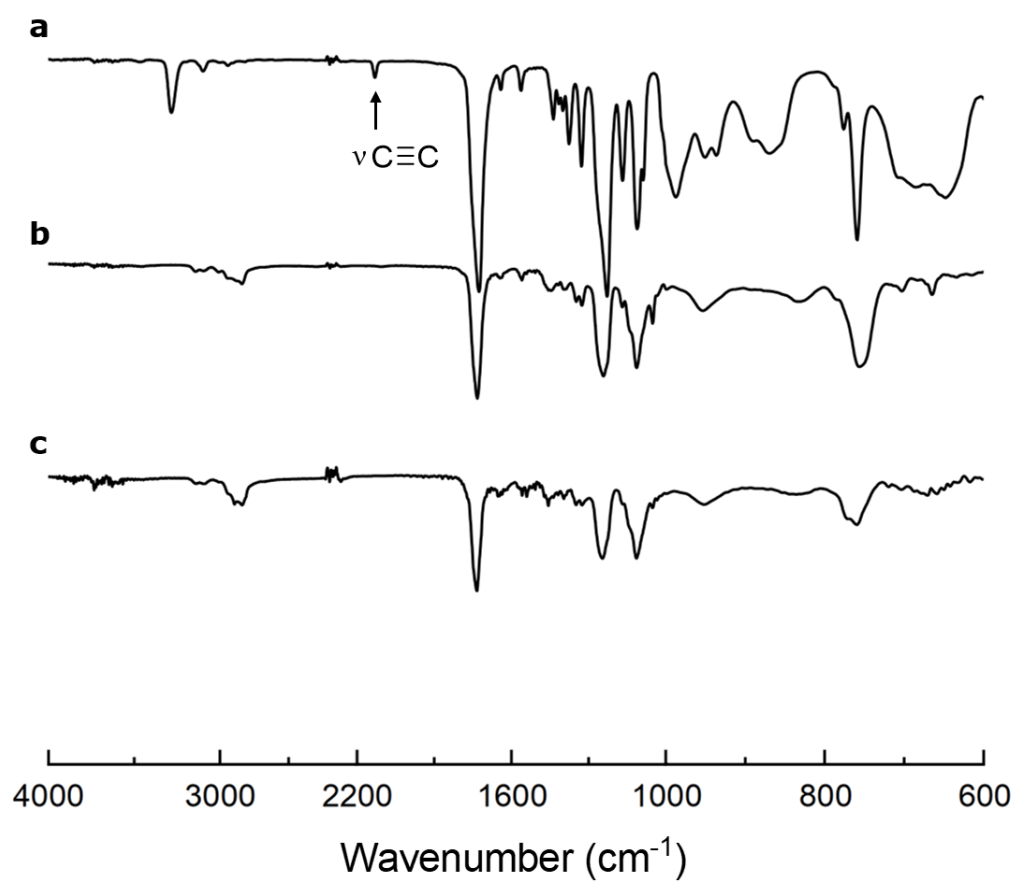

**Figure S4.** Infrared spectra of (a) **1**, (b) **P1**, and (c) **P2**.

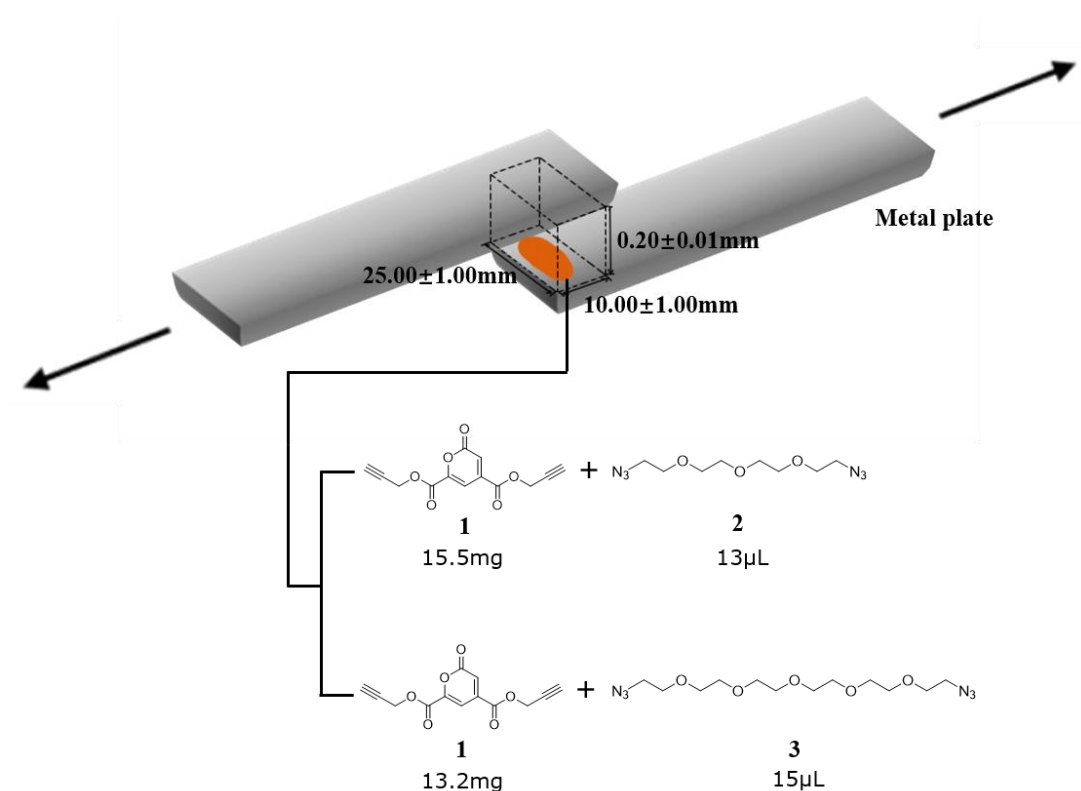

**Figure S5.** The tensile lap-shear strengths measurements of the in-situ polymerized **P1** (1+2) and **P2** (1+3).

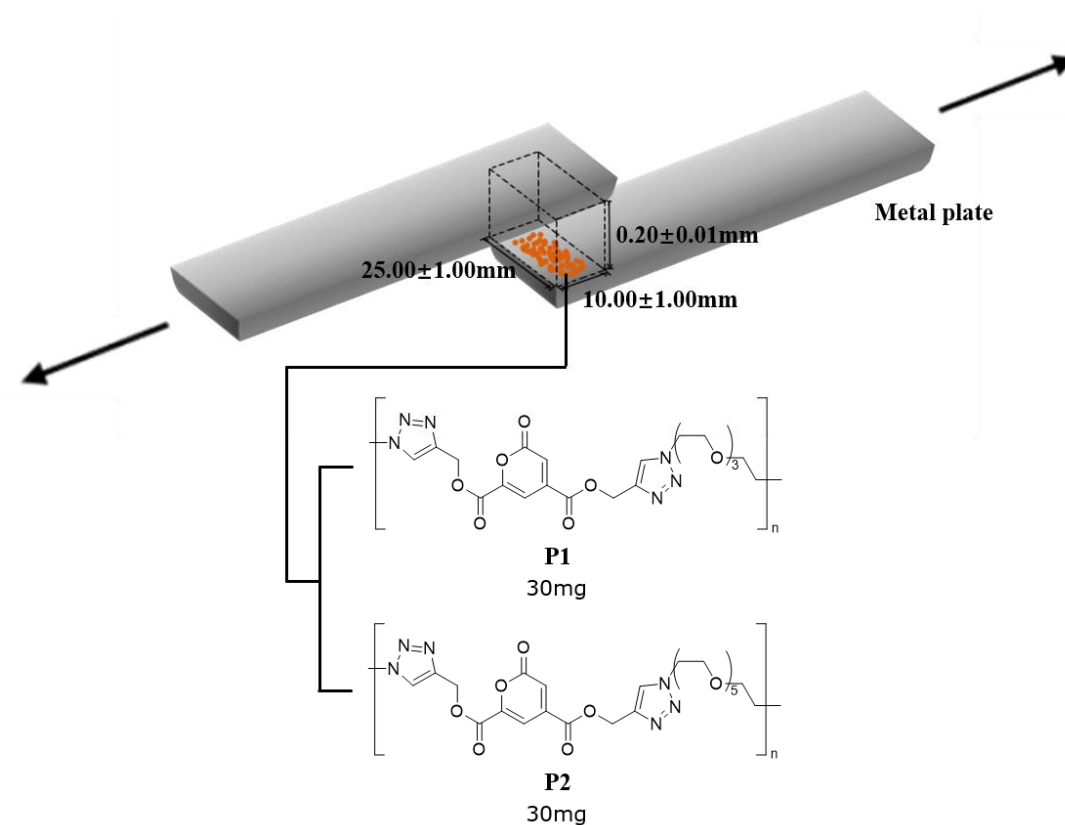

**Figure S6.** The tensile lap-shear strengths measurements of **P1** and **P2** prepared by CuAAC polymerization.
